# Supplementary material for: Germagraphene as a promising anode material for lithium-ion batteries predicted from first-principles calculations
Source: Royal Society of Chemistry journal article supplement (doi:10.1039/c8nh00333e), 2018-11-28
Supplement: c8nh00333e1.pdf [file c8nh00333e1.pdf]

## Supporting Information

### **Germagraphene as promising anode material for Lithium-ion batteries predicted from first-principles calculations**

Junping Hu<sup>a,b</sup>, Chuying Ouyang<sup>c</sup>, Hui Ying Yang<sup>a\*</sup>, Shengyuan A. Yang<sup>a,d\*</sup>

a. Research Laboratory for Quantum Materials, Singapore University of Technology and Design, Singapore 487372, Singapore

b. School of Science, Nanchang Institute of Technology, Nanchang 330099, China

c. Department of Physics, Laboratory of Computational Materials Physics, Jiangxi Normal University, Nanchang 330022, China

d. Center for Quantum Transport and Thermal Energy Science, School of Physics and Technology, Nanjing Normal University, Nanjing 210023, China

---

\*Corresponding Author:

[shengyuan\\_yang@sutd.edu.sg](mailto:shengyuan_yang@sutd.edu.sg);

[yanghuiying@sutd.edu.sg](mailto:yanghuiying@sutd.edu.sg)

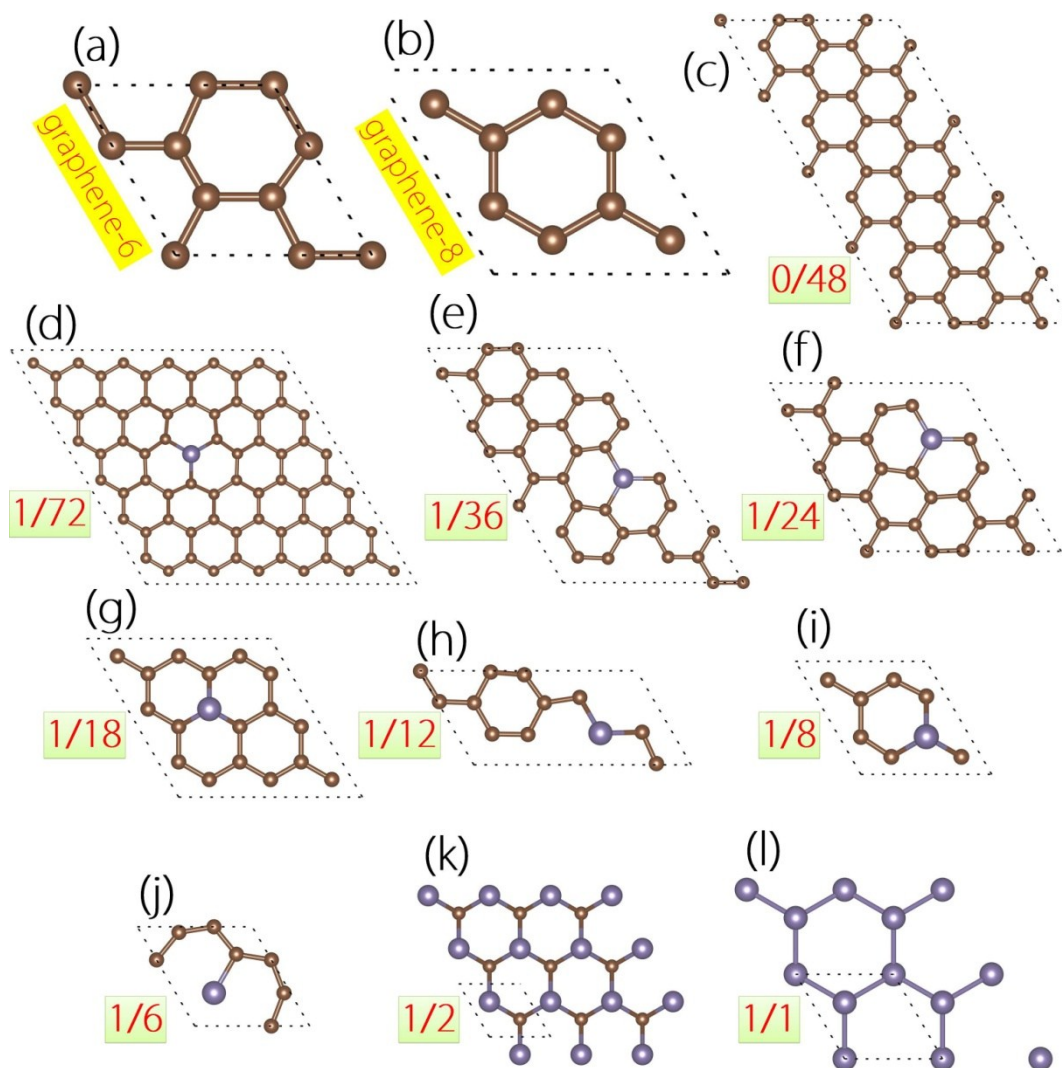

Figure S-1 all kinds of optimized structures: (a) graphene containing 6 C atoms; (b) graphene containing 8 C atoms; 10 different concentration configurations: (c)0/48, (d)1/72, (e)1/36, (f)1/24, (g)1/18, (h)1/12, (i)1/8, (j)1/6, (k)1/2, (l)1/1.

---
